# Supplementary material
Source: ML conference proceedings conference paper supplement (https://openreview.net/forum?id=n3z5oALWci)
Supplement: supplementary_material [file attachment]

## Sheet: instruction
There is a model that can classify sentences as positive or negative based on tone.
Each page is one question and will give an example sentence, its classification result, and two explanations of the model's behavior. The explanation is given in the form of sufficient conditions for the model to behave as it does.
You need to make predictions for the other sentences given based on each of the two explanations.
如：
"He never fails in any exam." was classified as positive and explained as
The words never and fails appear in the sentence at their original position.
so based on the explanation
He is so clever and never fails in any exam." Since the position of never and fails in the s
"He is so clever and never fails in any exam." Since the position of never and fails in the sentence does not satisfy the explanation, the result cannot be predicted.
If interpreted as: the words never and fails appear in the sentence.
Then both of the above sentences can be predicted to be positive.
Please fill sheet1 to 5

## Sheet: 说明
现有一个能够根据语气将句子分类为积极或消极的模型。
每一页为1道题目，将会给出一个例句，它的分类结果，并给出两种的对模型行为的解释。解释的方式为给出模型做出如此行为的充分条件。
你需要分别根据两种解释对给出的其他句子进行预测。
如：
He never fails in any exam. 被分类为积极，解释为：
单词never和fails在句子中出现且出于它们原本的位置。
则，根据解释，我们可以得知
He never fails to dissappoint me. 满足解释，应该被分类为积极。
He is so clever and never fails in any exam. 由于never和fails在句子中出现的位置不满足解释，则无法预知其结果。
如果解释为：单词never和fails在句子中出现。
则上述两个句子都可以被预测为积极。

## Sheet: Sheet1
input	output
pretentious editing ruins a potentially terrific flick .	negative
Please predict the output of the network when given the following inputs according to the two explanations:(0: negative, 1:positive, 2:unknown
	Explanation I: "ruins" appear(s) in the instance at their(its) origin positions.	Explanation II: "ruins" and "terrific" both appear in the instance and "terrific" is behind "'ruins'" and there are at least "0" words between them.
sentence:	prediction I:	prediction II:
ruins beneath terrific design .
editing ruins potentially terrific circumstances .
pretentious editing ruins a potentially terrific methodology
blue ruins are terrific
the on ruins a wonderful but flick theater
cult ruins a potentially lucrative planet
pretentious editing ruins potentially difficult solution
ice ruins potentially terrific ;
editing ruins without terrific positions
pretentious editing ruins describe potentially difficult behavioral .

## Sheet: Sheet2
input	output
addition to sporting one of the worst titles in recent cinematic history	negative
Please predict the output of the network when given the following inputs according to the two explanations:(0: negative, 1:positive, 2:unknown
	Explanation I: "titles" appear(s) in the instance at their(its) origin positions.	Explanation II: "worst" appear(s) in the instance with at least 0 words before it.
sentence:	prediction I:	prediction II:
addition lists of 11 worst matches history
tries to 16 or the worst in senior
addition to sporting one of ten worst titles in various competition .
addition to sample of titles recent organizational history
addition includes list of notable worst titles recent
to commemorate worst titles in recent conference history
thanks to sporting one of the best titles in different cinematic history
addition to directing one of the eleven titles of basic cinematic history
to sporting one of the worst performances in recent cinematic history
addition sporting one of worst titles in number seasons history

## Sheet: Sheet3
a marvellous journey from childhood idealism to adolescent self absorption .	positive
Please predict the output of the network when given the following inputs according to the two explanations:(0: negative, 1:positive, 2:unknown
	Explanation I: "from" and "adolescent" both appear in the instance and "adolescent" is before "'from'" with no words between them or "adolescent" is behind "'from'"	Explanation II: "self" appear(s) in the instance at their(its) origin positions.
sentence:	prediction I:	prediction II:
insights departure from idealism - adolescent self
a marvellous journey from cosmic ##less adolescent for absorption .
From marvellous experiences ##ful childhood childhood to measure self absorption
'a movement survivor from childhood recovery during delayed self absorption .'
marvellous from childhood idealism and adolescent self absorption
a marvellous from childhood idealism to adolescent with absorption :
An independent journey from criminal idealism towards adolescent self ##building
a marvellous perspective from childhood adolescent drug absorption
ccurs from childhood to adolescent insulin absorption .
A marvellous sounds from super adolescent fantasies

## Sheet: Sheet4
input	output
as a director , eastwood is off his game	negative
Please predict the output of the network when given the following inputs according to the two explanations:(0: negative, 1:positive, 2:unknown
	Explanation I: "off" appear(s) in the instance with at least 0 words before it.	Explanation II: "game" appear(s) in the instance at their(its) origin positions.
sentence:	prediction I:	prediction II:
as a director who finishes off his competitors
as a director eastwood a tour football game
Find a young eastwood is his game
longtime director eastwood is off game
our point is off board
as artistic director eastwood is off working debt
young former director dropping off
as a director since is off his game
as director eastwood interactive sports game
a spin off his game

## Sheet: Sheet5
input	output
that is far too tragic to merit such superficial treatment	negative
Please predict the output of the network when given the following inputs according to the two explanations:(0: negative, 1:positive, 2:unknown
	Explanation I: "treatment" appear(s) in the instance at their(its) origin	Explanation II: "tragic" and "superficial" both appear in the instance and "superficial" is before "'tragic'" with no words between them or "superficial" is behind "'tragic'"
sentence:	prediction I:	prediction II:
that person considered too small to merit meaningful specific treatment
physicians tissue failure tragic such superficial treatment
far eastern tragic after superficial treatment
beyond is far inferior merit treatment
probably far too tragic merit superficial
ome others can tragic to such superficial
that is far its tragic to finance such superficial treatment
of are far too tragic to merit such superficial scholarship
that proves too tragic to merit treatment
recipients to merit superficial treatment
