# Supplementary material
Source: ML conference proceedings conference paper supplement (https://openreview.net/forum?id=n3z5oALWci)
Supplement: supplementary_material [file user_study1_cgt.xlsx]

## Sheet: 说明
现有一个能够根据语气将句子分类为积极或消极的模型。
每一页为1道题目，将会给出一个例句，它的分类结果，并给出两种的对模型行为的解释。解释的方式为给出模型做出如此行为的充分条件。
你需要分别根据两种解释对给出的其他句子进行预测。
如：
He never fails in any exam. 被分类为积极，解释为：
单词never和fails在句子中出现且出于它们原本的位置。
则，根据解释，我们可以得知
He never fails to dissappoint me. 满足解释，应该被分类为积极。
He is so clever and never fails in any exam. 由于never和fails在句子中出现的位置不满足解释，则无法预知其结果。
如果解释为：单词never和fails在句子中出现。
则上述两个句子都可以被预测为积极。

## Sheet: Sheet1
input	output
pretentious editing ruins a potentially terrific flick .	negative
Please predict the output of the network when given the following inputs according to the two explanations:(0: negative, 1:positive, 2:unknown
	Explanation I: "ruins" appear(s) in the instance at their(its) origin positions.	Explanation II: "ruins" and "terrific" both appear in the instance and "terrific" is behind "'ruins'" and there are at least "0" words between them.
sentence:	prediction I:	prediction II:
ruins beneath terrific design .	2	1
editing ruins potentially terrific circumstances .	1	1
pretentious editing ruins a potentially terrific methodology	2	0
blue ruins are terrific	1	0
the on ruins a wonderful but flick theater	2	2
cult ruins a potentially lucrative planet	0	0
pretentious editing ruins potentially difficult solution	0	0
ice ruins potentially terrific ;	1	1
editing ruins without terrific positions	1	0
pretentious editing ruins describe potentially difficult behavioral .	1	2

## Sheet: Sheet2
input	output
addition to sporting one of the worst titles in recent cinematic history	negative
Please predict the output of the network when given the following inputs according to the two explanations:(0: negative, 1:positive, 2:unknown
	Explanation I: "titles" appear(s) in the instance at their(its) origin positions.	Explanation II: "worst" appear(s) in the instance with at least 0 words before it.
sentence:	prediction I:	prediction II:
addition lists of 11 worst matches history	2	0
tries to 16 or the worst in senior	2	0
addition to sporting one of ten worst titles in various competition .	0	0
addition to sample of titles recent organizational history	0	2
addition includes list of notable worst titles recent	1	0
to commemorate worst titles in recent conference history	2	2
thanks to sporting one of the best titles in different cinematic history	2	1
addition to directing one of the eleven titles of basic cinematic history	0	2
to sporting one of the worst performances in recent cinematic history	2	0
addition sporting one of worst titles in number seasons history	0	0

## Sheet: Sheet3
a marvellous journey from childhood idealism to adolescent self absorption .	positive
Please predict the output of the network when given the following inputs according to the two explanations:(0: negative, 1:positive, 2:unknown
	Explanation I: "from" and "adolescent" both appear in the instance and "adolescent" is before "'from'" with no words between them or "adolescent" is behind "'from'"	Explanation II: "self" appear(s) in the instance at their(its) origin positions.
sentence:	prediction I:	prediction II:
insights departure from idealism - adolescent self	1	2
a marvellous journey from cosmic ##less adolescent for absorption .	1	1
From marvellous experiences ##ful childhood childhood to measure self absorption	1	1
'a movement survivor from childhood recovery during delayed self absorption .'	2	2
marvellous from childhood idealism and adolescent self absorption	1	1
a marvellous from childhood idealism to adolescent with absorption :	1	2
An independent journey from criminal idealism towards adolescent self ##building	1	0
a marvellous perspective from childhood adolescent drug absorption	1	1
ccurs from childhood to adolescent insulin absorption .	1	2
A marvellous sounds from super adolescent fantasies	1	1

## Sheet: Sheet4
input	output
as a director , eastwood is off his game	negative
Please predict the output of the network when given the following inputs according to the two explanations:(0: negative, 1:positive, 2:unknown
	Explanation I: "off" appear(s) in the instance with at least 0 words before it.	Explanation II: "game" appear(s) in the instance at their(its) origin positions.
sentence:	prediction I:	prediction II:
as a director who finishes off his competitors	0	2
as a director eastwood a tour football game	2	1
Find a young eastwood is his game	2	1
longtime director eastwood is off game	0	0
our point is off board	0	2
as artistic director eastwood is off working debt	0	2
young former director dropping off	0	2
as a director since is off his game	0	0
as director eastwood interactive sports game	0	2
a spin off his game	0	0

## Sheet: Sheet5
input	output
that is far too tragic to merit such superficial treatment	negative
Please predict the output of the network when given the following inputs according to the two explanations:(0: negative, 1:positive, 2:unknown
	Explanation I: "treatment" appear(s) in the instance at their(its) origin	Explanation II: "tragic" and "superficial" both appear in the instance and "superficial" is before "'tragic'" with no words between them or "superficial" is behind "'tragic'"
sentence:	prediction I:	prediction II:
that person considered too small to merit meaningful specific treatment	1	0
physicians tissue failure tragic such superficial treatment	0	0
far eastern tragic after superficial treatment	0	0
beyond is far inferior merit treatment	0	2
probably far too tragic merit superficial	2	2
ome others can tragic to such superficial	2	0
that is far its tragic to finance such superficial treatment	1	0
of are far too tragic to merit such superficial scholarship	2	2
that proves too tragic to merit treatment	0	0
recipients to merit superficial treatment	2	2
